# Supplementary material for: Conducting Precision Medicine Research with African Americans
Source: PLoS One. 2016 Jul 21;11(7):e0154850. doi: 10.1371/journal.pone.0154850 (PMC4956119; doi:10.1371/journal.pone.0154850)
Supplement: S1 Table — (XLSX) [file pone.0154850.s001.xlsx]

## Sheet: Sheet1
Table 1. Sample Characteristics (n=510)†	Variable	Level	n (%)†
	Gender	Male	256.8 (51%)
		Female	250.4 (49%)
	Education Level	≥ Some college	257.1 (49%)
		≤ High school graduate	250.1 (51%)
	Employment Status	Employed	209 (41%)
		Not Employed	299.9 (57%)
	Age	Mean (SD)	42.2 (15.6)
	Health Insurance	Yes	390.8 (77%)
		No	116.4 (23%)
	Personal History of Cancer	Yes	15.7 (3%)
		No	491.6 (97%)
	Prior Study Participation	Yes	36.24 (7%)
		No	471 (93%)
	Distrust Researchers	Yes	262.4 (52%)
		No	244.8 (48%)
	Positive expectations	Mean (SD)	15.5 (2.5)
	Negative expectations about privacy	Mean (SD)	13.4 (3.8)
	Negative expectations about impact	Mean (SD)	16.7 (3.7)
	Altruism	Mean (SD)	14.2 (2.5)
†n and percent based on weighted data
